# Supplementary material for: Focal adhesion kinase is not required for integrin function or viability inDrosophila
Source: Oxford University Press journal article supplement (doi:10.1242/dev.01462), 2004-11-04
Supplement: dev01462-sup-suppdata.pdf [file dev01462-sup-suppdata.pdf]

## Data S1. Additional materials and methods

### Immunostainings and antibodies

Mouse monoclonal anti-GFP antibody was used at 1:1000 (Clontech), mouse monoclonal anti-PY100 antibodies were used at 1:1000 (Cell Signalling), rabbit anti- $\beta$ -gal antibodies were used at 1:150 (ICN Biomedicals), rabbit anti-Vasa antibodies (Lasko and Ashburner, 1990) were used at 1:500 (a kind gift from P. Lasko). Mouse monoclonal 2A12 antibody, which recognises an unknown tracheal luminal component was used at 1:5 (Developmental Hybridoma Bank). Anti-CREB antibodies (Andrew et al., 1997) were used at 1:15,000 (kind gift from D. Andrew), guinea pig anti-ALK antibody was used at 1:1000, mouse monoclonal anti-Fas3 antibodies were used at 1:50, mouse monoclonal anti-Elav (958A9) was used at 1:1000 and mouse monoclonal 22C10 was used at 1:50 (Developmental Hybridoma Bank). DAPI was used at a final concentration of 0.5 g/ml.

### Generation of Fak56 transgenic flies

The pBluescript:Fak56 (Palmer et al., 1999) was used as a template to create the Fak56-GFP fusion protein. A C-terminal segment of Fak56, corresponding to amino acids 1121-1204, was amplified by standard PCR using forward (5'-TTCTGGAGATTTGCTTCA-3') and reverse (5'-TGCTCGAGCACTGTGCGGTAAGTGTG-3') primers. The resulting PCR fragment was digested with *BsaBI/BamHI*, and subcloned in frame with GFP in the pEGFP vector (Clontech) (digested with *BsaBI/BamHI*), to create pEGFP:Fak56 aa1135-1204-GFP. Subsequently, pEGFP:Fak56 aa1135-1204-GFP was digested with *MunI/Xba I* and the 964 bp fragment, encoding Fak56 aa1135-1204-GFP, subcloned back into the vector encoding full-length Fak56 (pBluescript:Fak56) (digested with *MunI/XbaI*). This construct, named pBluescript:Fak56-GFP was confirmed by sequence analysis. To create pUAST:Fak56-GFP, pBluescript:Fak56-GFP was digested with *XhoI/Xba I* and the resulting 4434 bp fragment subcloned into pUAST vector (digested with *XhoI/XbaI*). The *Fak56* genomic rescue transgene was generated by subcloning a 10,189bp *ApaI-AlwNI* genomic DNA fragment containing 1,883 bp upstream of the nucleotide corresponding to the initiation AUG codon in the *Fak56* gene, and 2795 bp downstream of the polyA site, into the P-element transformation vector pCasper4. P element transformation was performed by microinjection together with a delta 2.3 transposase source containing plasmid, into *white*<sup>118</sup> embryos.

### Immunostainings of ovarioles

Ovaries from Fak56 mutant and wild-type fattened flies were dissected in PBS, fixed in PBS containing 4% formaldehyde for 20 minutes, rinsed, and blocked in NP40 block buffer (50 mM Tris pH 7.4, 150 mM NaCl, 0.5% NP40, 5 mg/ml BSA) overnight at 4°C (Bai et al., 2000). Egg chambers were incubated with rhodamine-phalloidin (Molecular Probes) and DAPI at a final concentration of 0.5 g/ml for 1 hour at room temperature. After three washes, egg chambers were mounted in PVA/DABCO mounting solution and analysed by confocal microscopy.
