# Supplementary material for: Focal adhesion kinase is not required for integrin function or viability inDrosophila
Source: Oxford University Press journal article supplement (doi:10.1242/dev.01462), 2004-11-04
Supplement: dev01462-sup-supptables.pdf [file dev01462-sup-supptables.pdf]

**Table S1. Localisation of muscle attachment site proteins in Fak56 mutant embryos**

| Muscle attachment site proteins analysed in this study | Localisation in Fak56 <sup>CG1</sup> |
|--------------------------------------------------------|--------------------------------------|
| Fak56                                                  | Absent                               |
| Fak56-PY397(430)                                       | Absent                               |
| Phosphotyrosine                                        | Wild type                            |
| $\beta$ PS integrin                                    | Wild type                            |
| $\alpha$ PS2 integrin                                  | Wild type                            |
| Muscle myosin (MHC)                                    | Wild type                            |
| Actin (Phalloidin)                                     | Wild type                            |
| Talin                                                  | Wild type                            |
| Tiggrin                                                | Wild type                            |
| ILK-GFP                                                | Wild type                            |

**Table S2. Analysis of various tissue development in Fak56 mutants**

| Other markers used to analyse Fak56 <sup>CG1</sup> | Localisation in Fak56 <sup>CG1</sup> |
|----------------------------------------------------|--------------------------------------|
| Fasciclin 3                                        | Wild type                            |
| $\beta$ -Tubulin                                   | Wild type                            |
| 22C10 (CNS)                                        | Wild type                            |
| Elav                                               | Wild type                            |
| 2A12 (Trachea)                                     | Wild type                            |
| ALK (Visceral mesoderm)                            | Wild type                            |
| CREB (Salivary glands)                             | Wild type                            |
| Vasa (Germ cells)                                  | Wild type                            |
| 258- <i>lacZ</i> (Endoderm)                        | Wild type                            |

Direct immunohistochemical analysis of Fak56 mutants was carried out with antibodies directed against the proteins indicated. The developing central nervous system was examined with mAb22C10 and anti-Elav, the tracheal system with 2A12, salivary gland migration with anti-CREB, the visceral mesoderm with anti-DAlk and Fas3, the germ cells with anti-Vasa, and the endoderm with 258-*lacZ*.
